# Supplementary material
Source: PubMed Central journal article supplement (PMC6145794)
Supplement: jamainternmed-178-667-s001.pdf [file jamainternmed-178-667-s001.pdf]

## Supplementary Online Content

Bradford AC, Bradford WD, Abraham A, Bagwell Adamas G. Association between US state medical cannabis laws and opioid prescribing in the Medicare Part D population. *JAMA Intern Med*. Published online April 2, 2018.  
doi:10.1001/jamainternmed.2018.0266

### **eAppendix**

**eTable 1:** Opioid Brand and Generic Names Used in Analysis

**eTable 2:** State Medical Cannabis Law Effective Dates (through 8/2016)

**eTable 3:** Daily doses prescribed for all opioids, with state fixed effects and clustering

**eTable 4:** Daily doses prescribed for opioids, by type with state fixed effects and clustering

**eTable 5:** Daily doses prescribed for opioids, by type with state fixed effects and clustering

**eTable 6:** Daily doses prescribed for opioids, by type with state fixed effects and clustering

**eTable 7:** Daily doses prescribed for opioids, by type with state fixed effects and clustering

**eTable 8:** Parallel Trends Test on Number of Daily Doses Filled

**eTable 9:** Placebo tests for effective MML parameter - opioids

**eTable 10:** Placebo tests for effective MML parameter - hydrocodone

**eTable 11:** Placebo tests for effective MML parameter - oxycodone

**eTable 12:** Placebo tests for effective MML parameter - fentanyl

**eTable 13:** Placebo tests for effective MML parameter - morphine

**eTable 14:** Placebo tests for effective MML parameter - methadone

**eTable 15:** Placebo tests for effective MML parameter – other opioid

This supplementary material has been provided by the authors to give readers additional information about their work.

## eAppendix

### *Model confounding variables*

For this study, we used the total number of daily doses prescribed by each physician. Our key dependent variable was the total number of daily doses (in millions) for any opioid medication prescribed in Medicare Part D in each state in each year. We also conducted secondary analyses where the dependent variables were the sum of all prescriptions (in millions) written in each of the six generic opioid groups in each state and year. The key independent variable was an indicator variable for states that had an MCL in place (an active law on the books and patients had active legal medical cannabis access). The data were aggregated to the state level, with one observation per state per year. We determined the association between any MCL and all opioid prescribing using adjusted linear regression models. We estimated two versions of these adjusted models: one with an indicator variable for any type of MCL and one with indicator variables for dispensary MCLs and home cultivation only MCLs (the two policy indicators were mutually exclusive). We also determined the association between MCLs and state aggregate prescribing for hydrocodone, oxycodone, fentanyl, morphine, methadone, and all other opioids separately. All regression models included the following set of state-level covariates (and a linear time trend and state fixed effects):

For moderating factors directly associated with cannabis use:

- an indicator variable to capture whether state has adopted legal recreational marijuana. (Note: Two states, Colorado and Washington, had legalized recreational cannabis from the beginning of 2013 through 2015 and three states, Alaska, the District of Columbia, and Oregon, had legalized recreational cannabis in a significant part of 2015. Thus, only 9 of the 306 state/year observations had legalized cannabis turned on in our analysis. While we believe that there are too few legal recreational cannabis observations to support inferences associated with this variable, we nonetheless include it to allow for the potential that omitting it could introduce bias in our other estimated coefficients. Econometrically, including a variable, like legalized cannabis, which may have a “true” zero association does not introduce bias.)

For moderating factors directly associated with physician prescribing of opioids:

- an indicator variable to capture whether the state has an operational electronic prescription drug monitoring program.
- a Herfindahl index of physician market competitiveness; this variable is the sum of squared physician Medicare Part D prescribing market shares in each county (averaged over the state), and is a standard measure in economics of how competitive a market is (near zero reflects perfect competition and a one reflects pure monopoly).

For moderating factors that represent the underlying influence of the overall economic environment on the demand for opioids:

- the percent of the population below the poverty line;
- the percent of the population enrolled in Medicare;
- the percent of Medicare enrollees in Medicare Advantage (managed care plans that generally have stronger drug utilization management controls);
- and, total state population.

## **eTable 1: Opioid Brand and Generic Names Used in Analysis**

**Hydrocodone:** ALOR, AZDONE, DAMASON, HYDROCODONE, HYSINGLA, IBUDONE, LORCET, LORTAB, MAXIDONE, NORCO, PANASAL, REPRESAIN, VICODIN, VICOPROFEN, ZOHYDRO, ZYDONE

**Oxycodone:** COMBUNOX, ENDODAN, OXECTA, OXYCOCET, OXYCODAN, OXYCONTIN, OXYFAST, OXYIR, OXYNORM, OYYCODONE, PERCOCET, PERCODAN, ROXICET, ROXICODONE, ROXIPRIN, TARGIN, TARGINACT, TARGINIQ, TROXYCA, TYLOX

**Fentanyl:** ABSTRAL, ACTIQ, DURAGESIC, DUROGESIC, FENTANYL, FENTORA, HALDID, INSTANYL, IONSYS, LAZANDA, MATRIFEN, ONSOLIS, SUBLIMAZE, SUBSYS

**Morphine:** ASTRAMORPH, AVINZA, DEPODUR, DURAMORPH, INFUMORPH, KADIAN, MORPHINE, MSIR, ORAMORPH, RESCUDOSE, ROXANOL

**Methadone:** AMIDONE, DISKETS, DOLOPHINE, HEPTADON, METHADONE, METHADOSE, PHYSEPTONE, SYMORON, WESTADONE

**Other opioid:** BUTORPHANOL, CODEINE, COTANAL, DARVON, DEMEROL, DILAUDID, DROMORAN, EXALGO, HYDROMORPHONE, HYDROSTAT, LEVORPHANOL, MEPERIDINE, NALBUPHINE, NUBAIN, NUCYNTA, NUMORPHAN, OPANA, OXYMORPHONE, PENTAZOCINE, PROPOXYPHENE, STADOL, TALWIN, TAPENTADOL, TRAMADOL, ULTAM, ULTRACET

| <b>eTable 2: State Medical Cannabis Law Effective Dates (through 8/2016)</b> |                      |                        |                                     |                                 |
|------------------------------------------------------------------------------|----------------------|------------------------|-------------------------------------|---------------------------------|
| State                                                                        | Date MCL was Enacted | Date MCL was Effective | Date Home Cultivation was Permitted | Date Dispensary Opened in State |
| ALABAMA                                                                      |                      |                        |                                     |                                 |
| ALASKA                                                                       | 11/1998              | 3/1999                 | 3/1999                              |                                 |
| ARIZONA                                                                      | 11/2010              | 4/2011                 | 4/2011                              | 12/2012                         |
| ARKANSAS                                                                     | 11/2016              |                        |                                     |                                 |
| CALIFORNIA                                                                   | 11/1996              | 11/1996                | 11/1996                             | 11/1996 (a)                     |
| COLORADO                                                                     | 11/2000              | 6/2001                 | 6/2001                              | 7/2005                          |
| CONNECTICUT                                                                  | 6/2012               | 5/2012                 |                                     | 10/2014                         |
| DELAWARE                                                                     | 5/2011               | 5/2011                 |                                     | 6/2015                          |
| DC                                                                           | 5/2010               | 8/2010                 |                                     | 7/2013                          |
| FLORIDA                                                                      | 11/2016              |                        |                                     |                                 |
| GEORGIA                                                                      |                      |                        |                                     |                                 |
| HAWAII                                                                       | 6/2000               | 12/2000                | 12/2000                             |                                 |
| IDAHO                                                                        |                      |                        |                                     |                                 |
| ILLINOIS                                                                     | 8/2013               | 1/2014                 |                                     | 11/2015                         |
| INDIANA                                                                      |                      |                        |                                     |                                 |
| IOWA                                                                         |                      |                        |                                     |                                 |
| KANSAS                                                                       |                      |                        |                                     |                                 |
| KENTUCKY                                                                     |                      |                        |                                     |                                 |
| LOUISIANA                                                                    |                      |                        |                                     |                                 |
| MAINE                                                                        | 11/1999              | 1/2000                 | 1/2000 (b)                          | 4/2011                          |
| MARYLAND                                                                     | 4/2014               | 6/2014                 |                                     |                                 |
| MASSACHUSETTS                                                                | 11/2012              | 1/2013                 | 1/2013                              | 7/2015                          |
| MICHIGAN                                                                     | 11/2008              | 12/2008                | 12/2008                             | 1/2009                          |
| MINNESOTA                                                                    | 6/2014               | 5/2014                 |                                     | 7/2015                          |
| MISSISSIPPI                                                                  |                      |                        |                                     |                                 |
| MISSOURI                                                                     |                      |                        |                                     |                                 |
| MONTANA                                                                      | 11/2004              | 11/2004                | 11/2004                             |                                 |
| NEBRASKA                                                                     |                      |                        |                                     |                                 |
| NEVADA                                                                       | 11/2000              | 10/2001                | 10/2001                             | 8/2015                          |
| NEW HAMPSHIRE                                                                | 7/2013               | 7/2013                 |                                     | 6/2016                          |
| NEW JERSEY                                                                   | 1/2010               | 6/2010                 |                                     | 12/2012                         |
| NEW MEXICO                                                                   | 3/2007               | 7/2007                 | 7/2007                              | 3/2009                          |
| NEW YORK                                                                     | 7/2014               | 7/2014                 |                                     | 6/2016                          |
| NORTH CAROLINA                                                               |                      |                        |                                     |                                 |
| NORTH DAKOTA                                                                 | 11/2016              |                        |                                     |                                 |
| OHIO                                                                         | 6/2016               |                        |                                     |                                 |
| OKLAHOMA                                                                     |                      |                        |                                     |                                 |

|                                                                                                                                                                                                                                                                                                    |         |         |         |         |
|----------------------------------------------------------------------------------------------------------------------------------------------------------------------------------------------------------------------------------------------------------------------------------------------------|---------|---------|---------|---------|
| OREGON                                                                                                                                                                                                                                                                                             | 11/1998 | 12/1998 | 12/1998 | 7/2009  |
| PENNSYLVANIA                                                                                                                                                                                                                                                                                       | 4/2016  | 6/2016  |         | 12/2016 |
| RHODE ISLAND                                                                                                                                                                                                                                                                                       | 1/2006  | 1/2006  | 1/2006  | 4/2013  |
| SOUTH CAROLINA                                                                                                                                                                                                                                                                                     |         |         |         |         |
| SOUTH DAKOTA                                                                                                                                                                                                                                                                                       |         |         |         |         |
| TENNESSEE                                                                                                                                                                                                                                                                                          |         |         |         |         |
| TEXAS                                                                                                                                                                                                                                                                                              |         |         |         |         |
| UTAH                                                                                                                                                                                                                                                                                               |         |         |         |         |
| VERMONT                                                                                                                                                                                                                                                                                            | 5/2004  | 7/2004  | 7/2004  | 6/2013  |
| VIRGINIA                                                                                                                                                                                                                                                                                           |         |         |         |         |
| WASHINGTON                                                                                                                                                                                                                                                                                         | 11/1998 | 12/1998 | 11/1998 | 7/2014  |
| WEST VIRGINIA                                                                                                                                                                                                                                                                                      |         |         |         |         |
| WISCONSIN                                                                                                                                                                                                                                                                                          |         |         |         |         |
| WYOMING                                                                                                                                                                                                                                                                                            |         |         |         |         |
|                                                                                                                                                                                                                                                                                                    |         |         |         |         |
| <p>(a) California has a complex history with dispensaries, which operated widely prior to the enactment of the MCL in 1996; dispensaries were first legally protected in 2003.</p> <p>(b) Caregivers can cultivate and sell, and were available as of December 1999.</p>                           |         |         |         |         |
| <p>Note: Michigan prohibits dispensaries. Minnesota only permits liquid, oil, pill or vaporizer. Pennsylvania does not permit smoking or any dry leaf or plant form. New York does not permit smoking. Michigan initially had, but then repealed, a dispensary program.</p>                        |         |         |         |         |
|                                                                                                                                                                                                                                                                                                    |         |         |         |         |
| Sources are:                                                                                                                                                                                                                                                                                       |         |         |         |         |
| <p>ProCon.org (2017). "29 Legal Medical Cannabis States and DC - Laws, Fees, and Possession Limits." Retrieved June 5, 2017, from <a href="http://medicalmarijuana.procon.org/view.resource.php?resourceID=000881">http://medicalmarijuana.procon.org/view.resource.php?resourceID=000881</a>.</p> |         |         |         |         |
| <p>Powell, D., et al. (2015). Do Medical Cannabis Laws Reduce Addictions and Deaths Related to Pain Killers?, National Bureau of Economic Research. Appendix A.</p>                                                                                                                                |         |         |         |         |
| <p>NORML (2015). "Medical Cannabis." Retrieved December 21, 2016, from <a href="http://norml.org/legal/medical-cannabis-2">http://norml.org/legal/medical-cannabis-2</a>.</p>                                                                                                                      |         |         |         |         |
| <p>Wen, H., et al. (2015). "The effect of medical cannabis laws on adolescent and adult use of cannabis, alcohol, and other substances." Journal of health economics 42: 64-80. Table 1.</p>                                                                                                       |         |         |         |         |
| <p>MPP (2016). State-by-State Medical Cannabis Laws: How to Remove the Threat of Arrest 2015. Washington, DC, Cannabis Policy Project.</p>                                                                                                                                                         |         |         |         |         |
|                                                                                                                                                                                                                                                                                                    |         |         |         |         |
| When sources conflict with one another, the earliest date is listed.                                                                                                                                                                                                                               |         |         |         |         |

eTable 3: Daily doses prescribed for all opioids, with state fixed effects and clustering

|                                                      | (1)                | (2)                |
|------------------------------------------------------|--------------------|--------------------|
|                                                      | All States         | All States         |
|                                                      | b/ci95             | b/ci95             |
| Medical cannabis law in effect                       | -2.211*            |                    |
|                                                      | [-4.574,0.152]     |                    |
| State had legalized recreational cannabis            | -1.210**           | -1.273***          |
|                                                      | [-2.131,-0.290]    | [-2.105,-0.442]    |
| State prescription drug monitoring program in effect | -0.350             | -0.222             |
|                                                      | [-1.387,0.687]     | [-1.246,0.801]     |
| Medicare prescriber Herfindahl index                 | 62.510             | 175.482            |
|                                                      | [-157.369,282.389] | [-73.266,424.230]  |
| Percent of population below Federal Poverty Level    | 1.593***           | 1.667***           |
|                                                      | [0.756,2.430]      | [0.833,2.501]      |
| Percent of population enrolled in Medicare           | 35.248             | 26.511             |
|                                                      | [-19.514,90.010]   | [-25.736,78.758]   |
| Percent Medicare in Medicare Advantage               | 50.074**           | 45.001**           |
|                                                      | [10.743,89.406]    | [8.706,81.295]     |
| Total state population (in millions)                 | 13.783***          | 13.503***          |
|                                                      | [10.707,16.858]    | [10.531,16.475]    |
| Time trend                                           | 0.216              | 0.574*             |
|                                                      | [-0.320,0.752]     | [-0.021,1.168]     |
| Medical cannabis dispensary open                     |                    | -3.742***          |
|                                                      |                    | [-6.289,-1.194]    |
| Medical cannabis home cultivation allowed            |                    | -1.792**           |
|                                                      |                    | [-3.532,-0.052]    |
| Constant                                             | -105.287***        | -106.498***        |
|                                                      | [-123.516,-87.059] | [-123.783,-89.214] |
| Number of Observations                               | 306                | 306                |

OLS regression coefficients on a model where the dependent variable is total opioid prescriptions. Percentage changes from the average all state level of prescribing in parentheses. 95% confidence intervals in brackets. Data are aggregated to all prescriptions in opioid category by state and year. State fixed effects are included in all models, but not shown here. Standard errors are clustered by state.

\* p<0.10, \*\* p<0.05, \*\*\* p<0.01

eTable 4: Daily doses prescribed for opioids, by type with state fixed effects and clustering

|                                                      | (1)               | (2)              | (3)             |
|------------------------------------------------------|-------------------|------------------|-----------------|
|                                                      | Hydrocodone       | Oxycodone        | Fentanyl        |
|                                                      | b/ci95            | b/ci95           | b/ci95          |
| Medical cannabis law in effect                       | -1.404*           | 0.039            | -0.133*         |
|                                                      | [-2.895,0.087]    | [-0.105,0.182]   | [-0.272,0.006]  |
| State had legalized recreational cannabis            | 0.164             | -0.041           | -0.129***       |
|                                                      | [-0.385,0.713]    | [-0.106,0.025]   | [-0.212,-0.046] |
| State prescription drug monitoring program in effect | -0.475            | 0.008            | 0.008           |
|                                                      | [-1.347,0.398]    | [-0.067,0.082]   | [-0.059,0.075]  |
| Medicare prescriber Herfindahl index                 | -58.500           | 2.691            | 7.525           |
|                                                      | [-180.464,63.464] | [-10.884,16.266] | [-8.013,23.062] |
| Percent of population below Federal Poverty Level    | 1.210***          | 0.047**          | 0.054**         |
|                                                      | [0.431,1.989]     | [0.004,0.090]    | [0.013,0.096]   |
| Percent of population enrolled in Medicare           | 49.321**          | 0.069            | 1.295           |
|                                                      | [10.908,87.734]   | [-2.578,2.716]   | [-1.393,3.983]  |
| Percent Medicare in Medicare Advantage               | 25.115*           | -0.213           | 2.523**         |
|                                                      | [-0.301,50.530]   | [-1.831,1.406]   | [0.627,4.418]   |
| Total state population (in millions)                 | 3.834**           | 0.058            | 0.679***        |
|                                                      | [0.636,7.033]     | [-0.103,0.220]   | [0.190,1.168]   |
| Time trend                                           | -0.126            | 0.021            | 0.021           |
|                                                      | [-0.475,0.222]    | [-0.017,0.058]   | [-0.018,0.059]  |
| Constant                                             | -40.172***        | -0.368           | -4.701***       |
|                                                      | [-62.345,-17.999] | [-1.877,1.142]   | [-7.977,-1.426] |
| Number of Observations                               | 306               | 306              | 306             |

OLS regression coefficients on a model where the dependent variable is total opioid prescriptions. Percentage changes from the average all state level of prescribing in parentheses. 95% confidence intervals in brackets. Data are aggregated to all prescriptions in opioid category by state and year. State fixed effects are included in all models, but not shown here. Standard errors are clustered by state.

\* p<0.10, \*\* p<0.05, \*\*\* p<0.01

eTable 5: Daily doses prescribed for opioids, by type with state fixed effects and clustering

|                                                      | (1)              | (2)             | (3)               |
|------------------------------------------------------|------------------|-----------------|-------------------|
|                                                      | Morphine         | Methadone       | Other Opioid      |
|                                                      | b/ci95           | b/ci95          | b/ci95            |
| Medical cannabis law in effect                       | -0.246**         | 0.006           | -0.472            |
|                                                      | [-0.478,-0.015]  | [-0.063,0.075]  | [-1.241,0.296]    |
| State had legalized recreational cannabis            | -0.167**         | -0.047          | -0.989***         |
|                                                      | [-0.331,-0.003]  | [-0.114,0.019]  | [-1.519,-0.460]   |
| State prescription drug monitoring program in effect | -0.076           | -0.007          | 0.192             |
|                                                      | [-0.221,0.068]   | [-0.042,0.028]  | [-0.225,0.609]    |
| Medicare prescriber Herfindahl index                 | 39.159**         | 6.460*          | 65.175            |
|                                                      | [6.636,71.682]   | [-0.050,12.971] | [-36.876,167.226] |
| Percent of population below Federal Poverty Level    | 0.106***         | 0.041***        | 0.135             |
|                                                      | [0.038,0.174]    | [0.011,0.070]   | [-0.198,0.468]    |
| Percent of population enrolled in Medicare           | -0.649           | 1.146           | -15.934           |
|                                                      | [-5.636,4.338]   | [-0.255,2.546]  | [-35.420,3.553]   |
| Percent Medicare in Medicare Advantage               | 3.390**          | -0.135          | 19.395***         |
|                                                      | [0.202,6.578]    | [-1.028,0.757]  | [7.802,30.988]    |
| Total state population (in millions)                 | 1.403**          | 0.163**         | 7.645***          |
|                                                      | [0.175,2.630]    | [0.010,0.315]   | [5.103,10.188]    |
| Time trend                                           | 0.123**          | 0.009           | 0.168             |
|                                                      | [0.031,0.216]    | [-0.011,0.028]  | [-0.125,0.462]    |
| Constant                                             | -10.750***       | -1.264**        | -48.032***        |
|                                                      | [-18.207,-3.294] | [-2.446,-0.083] | [-63.322,-32.741] |
| Number of Observations                               | 306              | 306             | 306               |

OLS regression coefficients on a model where the dependent variable is total opioid prescriptions. Percentage changes from the average all state level of prescribing in parentheses. 95% confidence intervals in brackets. Data are aggregated to all prescriptions in opioid category by state and year. State fixed effects are included in all models, but not shown here. Standard errors are clustered by state.

\* p<0.10, \*\* p<0.05, \*\*\* p<0.01



eTable 6: Daily doses prescribed for opioids, by type with state fixed effects and clustering

|                                                      | (1)                | (2)              | (3)             |
|------------------------------------------------------|--------------------|------------------|-----------------|
|                                                      | Hydrocodone        | Oxycodone        | Fentanyl        |
|                                                      | b/ci95             | b/ci95           | b/ci95          |
| Medical cannabis dispensary open                     | -2.320***          | 0.081            | -0.152*         |
|                                                      | [-3.782,-0.859]    | [-0.043,0.205]   | [-0.332,0.028]  |
| Medical cannabis home cultivation allowed            | -1.256**           | 0.083            | -0.047          |
|                                                      | [-2.319,-0.193]    | [-0.025,0.192]   | [-0.168,0.075]  |
| State had legalized recreational cannabis            | 0.099              | -0.030           | -0.124***       |
|                                                      | [-0.458,0.656]     | [-0.098,0.038]   | [-0.205,-0.044] |
| State prescription drug monitoring program in effect | -0.389             | 0.004            | 0.014           |
|                                                      | [-1.250,0.472]     | [-0.071,0.079]   | [-0.053,0.082]  |
| Medicare prescriber Herfindahl index                 | 9.781              | 0.290            | 11.169          |
|                                                      | [-120.805,140.367] | [-12.061,12.642] | [-7.336,29.674] |
| Percent of population below Federal Poverty Level    | 1.258***           | 0.044**          | 0.055**         |
|                                                      | [0.479,2.037]      | [0.005,0.084]    | [0.013,0.096]   |
| Percent of population enrolled in Medicare           | 44.221**           | 0.148            | 0.851           |
|                                                      | [6.992,81.450]     | [-2.326,2.623]   | [-1.920,3.622]  |
| Percent Medicare in Medicare Advantage               | 22.293*            | -0.243           | 2.154**         |
|                                                      | [-1.356,45.941]    | [-1.708,1.221]   | [0.359,3.950]   |
| Total state population (in millions)                 | 3.660**            | 0.068            | 0.676***        |
|                                                      | [0.636,6.685]      | [-0.086,0.222]   | [0.191,1.162]   |
| Time trend                                           | 0.086              | 0.015            | 0.035           |
|                                                      | [-0.283,0.454]     | [-0.020,0.051]   | [-0.013,0.083]  |
| Constant                                             | -40.982***         | -0.309           | -4.704***       |
|                                                      | [-62.381,-19.582]  | [-1.755,1.137]   | [-8.045,-1.362] |
| Number of Observations                               | 306                | 306              | 306             |

OLS regression coefficients on a model where the dependent variable is total opioid prescriptions. Percentage changes from the average all state level of prescribing in parentheses. 95% confidence intervals in brackets. Data are aggregated to all prescriptions in opioid category by state and year. State fixed effects are included in all models, but not shown here. Standard errors are clustered by state.

\* p<0.10, \*\* p<0.05, \*\*\* p<0.01

eTable 7: Daily doses prescribed for opioids, by type with state fixed effects and clustering

|                                                      | (1)              | (2)             | (3)               |
|------------------------------------------------------|------------------|-----------------|-------------------|
|                                                      | Morphine         | Methadone       | Other Opioid      |
|                                                      | b/ci95           | b/ci95          | b/ci95            |
| Medical cannabis dispensary open                     | -0.361**         | 0.009           | -0.998*           |
|                                                      | [-0.718,-0.005]  | [-0.062,0.080]  | [-2.190,0.194]    |
| Medical cannabis home cultivation allowed            | -0.149           | 0.035           | -0.458            |
|                                                      | [-0.364,0.065]   | [-0.017,0.087]  | [-1.174,0.258]    |
| State had legalized recreational cannabis            | -0.167*          | -0.041          | -1.009***         |
|                                                      | [-0.357,0.023]   | [-0.102,0.020]  | [-1.498,-0.520]   |
| State prescription drug monitoring program in effect | -0.063           | -0.008          | 0.220             |
|                                                      | [-0.205,0.078]   | [-0.041,0.025]  | [-0.196,0.636]    |
| Medicare prescriber Herfindahl index                 | 49.369**         | 6.403*          | 98.469            |
|                                                      | [10.014,88.724]  | [-0.621,13.427] | [-31.230,228.168] |
| Percent of population below Federal Poverty Level    | 0.111***         | 0.040***        | 0.159             |
|                                                      | [0.039,0.183]    | [0.011,0.069]   | [-0.194,0.513]    |
| Percent of population enrolled in Medicare           | -1.570           | 1.094           | -18.233*          |
|                                                      | [-6.451,3.311]   | [-0.362,2.549]  | [-37.764,1.298]   |
| Percent Medicare in Medicare Advantage               | 2.766*           | -0.207          | 18.238***         |
|                                                      | [-0.219,5.751]   | [-1.043,0.630]  | [7.184,29.291]    |
| Total state population (in millions)                 | 1.382**          | 0.164**         | 7.552***          |
|                                                      | [0.175,2.589]    | [0.014,0.315]   | [4.928,10.176]    |
| Time trend                                           | 0.158***         | 0.010           | 0.270             |
|                                                      | [0.050,0.266]    | [-0.013,0.032]  | [-0.107,0.646]    |
| Constant                                             | -10.830***       | -1.244**        | -48.430***        |
|                                                      | [-18.201,-3.458] | [-2.418,-0.069] | [-64.320,-32.539] |
| Number of Observations                               | 306              | 306             | 306               |

OLS regression coefficients on a model where the dependent variable is total opioid prescriptions. Percentage changes from the average all state level of prescribing in parentheses. 95% confidence intervals in brackets. Data are aggregated to all prescriptions in opioid category by state and year. State fixed effects are included in all models, but not shown here. Standard errors are clustered by state.

\* p<0.10, \*\* p<0.05, \*\*\* p<0.01

eTable 8: Parallel Trends Test on Number of Daily Doses Filled

|              | Coefficient on Parallel Trend | Standard Error | T-Test Statistic |  |
|--------------|-------------------------------|----------------|------------------|--|
| Opioids      | 2.15                          | 5.12           | 0.42             |  |
| Hydrocodone  | 1.21                          | 2.87           | 0.42             |  |
| Oxycodone    | 0.03                          | 0.18           | 0.16             |  |
| Fentanyl     | 0.21                          | 0.28           | 0.75             |  |
| Morphine     | -0.15                         | 0.35           | -0.42            |  |
| Methadone    | 0.03                          | 0.15           | 0.21             |  |
| Other opioid | 0.82                          | 1.60           | 0.51             |  |

Note: The coefficient is from an interaction with the time trend (year) variable and an indicator variable for whether the state will adopt an MML in a regression on state-level average daily doses filled for each clinical condition listed, as:

$$\overline{Doses}_{st} = \beta_0 + \beta_1 \cdot Time_t + \beta_2 \cdot \mathbf{1}(\text{State will adopt MML}) + \beta_3 Time_t \cdot \mathbf{1}(\text{State will adopt MML}) + \varepsilon_{st}$$

This model is run during the time periods when MML=0 for those states that ultimately adopt and for all time periods for states that never adopt. Observations after the year 2014 are dropped since all “ever adopting” states have adopted an MML by that year. The unit of observation is state level average daily doses per year. The test of parallel trends is a test of the null hypothesis that the coefficient on time\* $\mathbf{1}(\text{State will adopt an MML}) = 0$ . This hypothesis is not rejected for any of the conditions.

eTable 9: Placebo tests for effective MML parameter - opioids

|                       | (1)                                | (2)                                |
|-----------------------|------------------------------------|------------------------------------|
|                       | Lower Bound<br>Placebo<br>Estimate | Upper Bound<br>Placebo<br>Estimate |
|                       | mean                               | mean                               |
| Any MML in effect     | -0.12                              | 0.017                              |
| Dispensary open       | -0.11                              | 0.068                              |
| Home cultivation only | -0.17                              | -0.0042                            |
| Observations          | 101                                | 101                                |

Placebo estimates were based on 100 iterations with random assignment of effective MMLs, dispensary and home cultivation MMLs to non-MML states and pre-MML periods to all MML states. Lower and upper bounds of the placebo estimates were calculated using 95 percent confidence intervals on the estimated parameters using each repetition of the simulated placebo trials.

eTable 10: Placebo tests for effective MML parameter - hydrocodone

|                       | (1)                                | (2)                                |
|-----------------------|------------------------------------|------------------------------------|
|                       | Lower Bound<br>Placebo<br>Estimate | Upper Bound<br>Placebo<br>Estimate |
|                       | mean                               | mean                               |
| Any MML in effect     | -0.058                             | 0.052                              |
| Dispensary open       | -0.046                             | 0.091                              |
| Home cultivation only | -0.096                             | 0.041                              |
| Observations          | 101                                | 101                                |

Placebo estimates were based on 100 iterations with random assignment of effective MMLs, dispensary and home cultivation MMLs to non-MML states and pre-MML periods to all MML states. Lower and upper bounds of the placebo estimates were calculated using 95 percent confidence intervals on the estimated parameters using each repetition of the simulated placebo trials.

eTable 11: Placebo tests for effective MML parameter - oxycodone

|                       | (1)                                | (2)                                |
|-----------------------|------------------------------------|------------------------------------|
|                       | Lower Bound<br>Placebo<br>Estimate | Upper Bound<br>Placebo<br>Estimate |
|                       | mean                               | mean                               |
| Any MML in effect     | -0.0051                            | 0.0015                             |
| Dispensary open       | -0.0053                            | 0.0030                             |
| Home cultivation only | -0.0079                            | 0.0024                             |
| Observations          | 101                                | 101                                |

Placebo estimates were based on 100 iterations with random assignment of effective MMLs, dispensary and home cultivation MMLs to non-MML states and pre-MML periods to all MML states. Lower and upper bounds of the placebo estimates were calculated using 95 percent confidence intervals on the estimated parameters using each repetition of the simulated placebo trials.

eTable 12: Placebo tests for effective MML parameter - fentanyl

|                       | (1)                                | (2)                                |
|-----------------------|------------------------------------|------------------------------------|
|                       | Lower Bound<br>Placebo<br>Estimate | Upper Bound<br>Placebo<br>Estimate |
|                       | mean                               | mean                               |
| Any MML in effect     | -0.0075                            | 0.00062                            |
| Dispensary open       | -0.0079                            | 0.0012                             |
| Home cultivation only | -0.0089                            | 0.0025                             |
| Observations          | 101                                | 101                                |

Placebo estimates were based on 100 iterations with random assignment of effective MMLs, dispensary and home cultivation MMLs to non-MML states and pre-MML periods to all MML states. Lower and upper bounds of the placebo estimates were calculated using 95 percent confidence intervals on the estimated parameters using each repetition of the simulated placebo trials.

eTable 13: Placebo tests for effective MML parameter - morphine

|                       | (1)                                | (2)                                |
|-----------------------|------------------------------------|------------------------------------|
|                       | Lower Bound<br>Placebo<br>Estimate | Upper Bound<br>Placebo<br>Estimate |
|                       | mean                               | mean                               |
| Any MML in effect     | -0.0078                            | 0.0091                             |
| Dispensary open       | -0.0084                            | 0.014                              |
| Home cultivation only | -0.013                             | 0.0096                             |
| Observations          | 101                                | 101                                |

Placebo estimates were based on 100 iterations with random assignment of effective MMLs, dispensary and home cultivation MMLs to non-MML states and pre-MML periods to all MML states. Lower and upper bounds of the placebo estimates were calculated using 95 percent confidence intervals on the estimated parameters using each repetition of the simulated placebo trials.

eTable 14: Placebo tests for effective MML parameter - methadone

|                       | (1)                                | (2)                                |
|-----------------------|------------------------------------|------------------------------------|
|                       | Lower Bound<br>Placebo<br>Estimate | Upper Bound<br>Placebo<br>Estimate |
|                       | mean                               | mean                               |
| Any MML in effect     | -0.0028                            | 0.00057                            |
| Dispensary open       | -0.0033                            | 0.00072                            |
| Home cultivation only | -0.0035                            | 0.0012                             |
| Observations          | 101                                | 101                                |

Placebo estimates were based on 100 iterations with random assignment of effective MMLs, dispensary and home cultivation MMLs to non-MML states and pre-MML periods to all MML states. Lower and upper bounds of the placebo estimates were calculated using 95 percent confidence intervals on the estimated parameters using each repetition of the simulated placebo trials.

eTable 15: Placebo tests for effective MML parameter – other opioid

|                       | (1)                                | (2)                                |
|-----------------------|------------------------------------|------------------------------------|
|                       | Lower Bound<br>Placebo<br>Estimate | Upper Bound<br>Placebo<br>Estimate |
|                       | mean                               | mean                               |
| Any MML in effect     | -0.027                             | 0.039                              |
| Dispensary open       | -0.030                             | 0.048                              |
| Home cultivation only | -0.036                             | 0.049                              |
| Observations          | 101                                | 101                                |

Placebo estimates were based on 100 iterations with random assignment of effective MMLs, dispensary and home cultivation MMLs to non-MML states and pre-MML periods to all MML states. Lower and upper bounds of the placebo estimates were calculated using 95 percent confidence intervals on the estimated parameters using each repetition of the simulated placebo trials.
